# Supplementary material for: Solvent directing immediate fluorination of aromatic ketones using 1-fluoro-4-hydroxy-1,4-diazoniabicyclo[2.2.2]octane bis(tetrafluoroborate)
Source: Royal Society of Chemistry journal article supplement (doi:10.1039/b003488f), 2000-01-01
Supplement: b003488f.doc [file b003488f.doc]

Solvent Directing Immediate Fluorination of Aromatic Ketones Using 1-Fluoro-4-hydroxy-1,4-diazoniabicyclo[2.2.2]octane bis tetrafluoroborate.

Stojan Stavber*, Marjan Jereb and Marko Zupan

Laboratory for Organic and Bioorganic Chemistry, "Jožef Stefan" Institute and Department of Chemistry, University of Ljubljana, Jamova 39, 61000 Ljubljana, SLOVENIA. Fax: ++386 61 1773 811; e-mail: stojan.stavber@ijs.si

**(±) 2-fluoro-5-methoxy-2,3-dihydro-1H-inden-1-one,** (**4a**), white crystals (85% from n-hexane/acetone); mp 123.5-125.3°C; 1H NMR 3.07-3.70 (m, 2H), 3.95 (s, 3H), 5.28 (ddd, 1H, 51, 7, 5 Hz), 7.06 (m, 2H), 7.80 (d, 1H, 9Hz); 19F NMR  -192.8 (ddd, 51, 22.6, 10 Hz); IR: 1704, 1597 cm-1; MS m/z (%) 180 (M+, 100), 161 (21), 152 (35), 134 (40), 109 (26), 106 (46). Anal. Calcd for C10H9FO2: C, 66.66; H, 5.03. Found: C, 66.49; H, 4,93.

**(±) 2-fluoro-6-methoxy-3,4-dihydro-1(2H)-naphthalenone**, (**4b**), white crystals (85% from n-hexane/dichloromethane); mp 111.2-112.1°C; 1NMR  2.17-2.70 (m, 2H), 3.00-3.27 (m, 2H), 3.90 (s, 3H), 5.17 (ddd, 1H, 49, 11, 6 Hz), 7.80-8.05 (br s, d, 2H, 3 Hz), 8.07 (d, 1H, 8 Hz); 19F NMR  -191.3 (td, 49, 9.4 Hz); IR: 1688, 1600 cm-1; MS m/z 194 (M+, 55), 148 (100), 120 (40), 91 (17). Anal. Calcd for C11H11FO2: C, 68.03; H, 5.71. Found: C, 68.33; H, 5.53.

**(±) 2-fluoro-6-methoxy-2,3-dihydro-1H-inden-1-one**, (**2a**), white crystals (82% from n-pentane/acetone); mp 62-63.7°C; 1H NMR 3.05-3.62 (m, 2H), 3.87 (s, 3H), 5.30 (ddd, 1H, 51, 7, 5 Hz), 7.22-7.45 (m, 3H); 19F NMR  -194.2 (ddd, 51, 20.9, 8.5 Hz); IR: 1709 cm-1; MS m/z (%) 180 (M+, 100), 152 (69), 137 (41), 109 (35). Anal. Calcd for C10H9FO2: C, 66.66; H, 5.03. Found: C, 66.52; H, 4,91.

**(±) 2-fluoro-7-methoxy-3,4-dihydro-1(2H)-naphthalenone**,(**2b**), white crystals (85% from petroether/acetone); mp 81-83°C; 1H NMR  2.20-2.70 (m, 2H), 2.95-3.20 (m, 2H), 3.83 (s, 3H), 5.13 (ddd, 1H, 48, 12, 6 Hz), 7.21 (br s, 2H), 7.60 (s, 1H); 19F NMR  -191.3 (td, 48, 8.5 Hz); IR: 1690, 1610 cm-1; MS m/z 194 (M+, 100), 148 (61), 120 (61). Anal. Calcd for C11H11FO2: C, 68.03; H, 5.71. Found: C, 68.34; H, 5.91.

**1-(9-phenantryl)-2-fluoroethanone**,(**9**), white crystals (75%, TLC purification followed by crystallization from n-pentane/acetone); mp 97.5-99.5°C; 1H NMR  5.67 (d, 2H, 48 Hz), 7.6-8.03 (m, 5H), 8.27 (s, 1H), 8.63-8.90 (m, 3H); 19F NMR  -226.2 (d, 48 Hz); IR: 1687 cm-1; MS m/z (%) 238 (M+, 37), 205 (100), 177 (79), 151 (20), 88 (36). Anal. Calcd for C16H11FO: C, 80.66; H, 4.65. Found: C, 81.12; H, 4,62.

**7-fluoro-6-methoxy-2,3-dihydro-1H-inden-1-one**,(**3a**), white crystals (58%); 1H NMR  2.60-3.17 (m, 4H), 3.93 (s, 3H), 7.1-7.52 (m, 2H); 19F NMR  -138.7 (d, 6.5 Hz); MS m/z 180 (M+, 70), 165 (7), 152 (43), 137 (34), 119(39), 109 (38), 91 (49); HRMS Calcd for C10H9FO2: 180.0586. Found:180.0592.

**8-fluoro-7-methoxy-3,4-dihydro-1(2H)-naphthalenone**,(**3b**), white crystals (57%); mp 82.4-84°C; 1H NMR  1.95-3.00 (m, 6H), 3.88 (s, 3H), 6.87-7.27 (m, 2H); 19F NMR  -135.7 (d, 6.6 Hz); MS m/z 194 (M+, 89), 179 (11), 166 (43), 138 (100); HRMS Calcd for C11H11FO2: 194.0743. Found:194.0751.

**4-fluoro-5-methoxy-2,3-dihydro-1H-inden-1-one**,(**5a**) **and 6-fluoro-5-methoxy-2,3-dihydro-1H-inden-1-one**,(**6a**), mixture in ratio (3/1), (5a): 19F NMR  -142.7 (d, 6.6 Hz), (6a): 19F NMR  -135.7 (dd, 9.4 Hz); MS m/z 180 (M+,100), 165 (14), 152 (44), 137 (26); HRMS Calcd for C10H9FO2: 180.0586. Found:180.0587.
